# Supplementary material for: CuO nanostructure-decorated InGaN nanorods for selective H2S gas detection
Source: Royal Society of Chemistry journal article supplement (doi:10.1039/d3cp06318f), 2024-01-01
Supplement: d3cp06318f1.pdf [file d3cp06318f1.pdf]

## Supporting information

### CuO Nanostructure-Decorated InGaN Nanorods for Selective H<sub>2</sub>S Gas Detection

*Chandrakalavathi Thota<sup>1,2¶</sup>, C. Gangadhara<sup>3¶</sup>, Dhanalakshmi Radhalayam<sup>4</sup>, Singiri Ramu<sup>5</sup>,  
Paruchuri Kandiah<sup>6</sup>, C. Ningappa<sup>3</sup>, Maddaka Reddeppa<sup>7\*</sup>, Moon-Deock Kim<sup>1\*</sup>*

<sup>1</sup>Department of Physics and Institute of Quantum Systems (IQS), Chungnam National University, 99 Daehak-ro, Yuseong-gu, Daejeon, 34134, Republic of Korea

<sup>2</sup> Department of Biomedical Engineering, University of Michigan, Ann Arbor, Michigan 48109, United States

<sup>3</sup>Department of Physics, The Visveswaraya Technological University, Belgavi 590018, India

<sup>4</sup>Energy Storage and Conversion Laboratory, Department of Electrical Engineering, Chungnam National University, Daejeon 34134, Republic of Korea

<sup>5</sup> Department of Electronic Engineering, Gangneung-Wonju National University, Gangneung, 25457, South Korea

<sup>6</sup>Department of Mechanical Engineering, Virginia Tech, Blacksburg, Virginia – 24061

<sup>7</sup>Department of Electrical Engineering and Computer Science, University of Michigan, Ann Arbor, Michigan 48109, United States

[<sup>+</sup>] These authors contributed equally to this work.

\*Corresponding author E-mail: [reddeppa@umich.edu](mailto:reddeppa@umich.edu), [mdkim@cnu.ac.kr](mailto:mdkim@cnu.ac.kr)

The top-view of InGaN NRs and the elemental mapping of InGaN NRs is shown in Figure S1.

It was noticed that an inhomogeneous distribution of the In composition in the InGaN NRs.

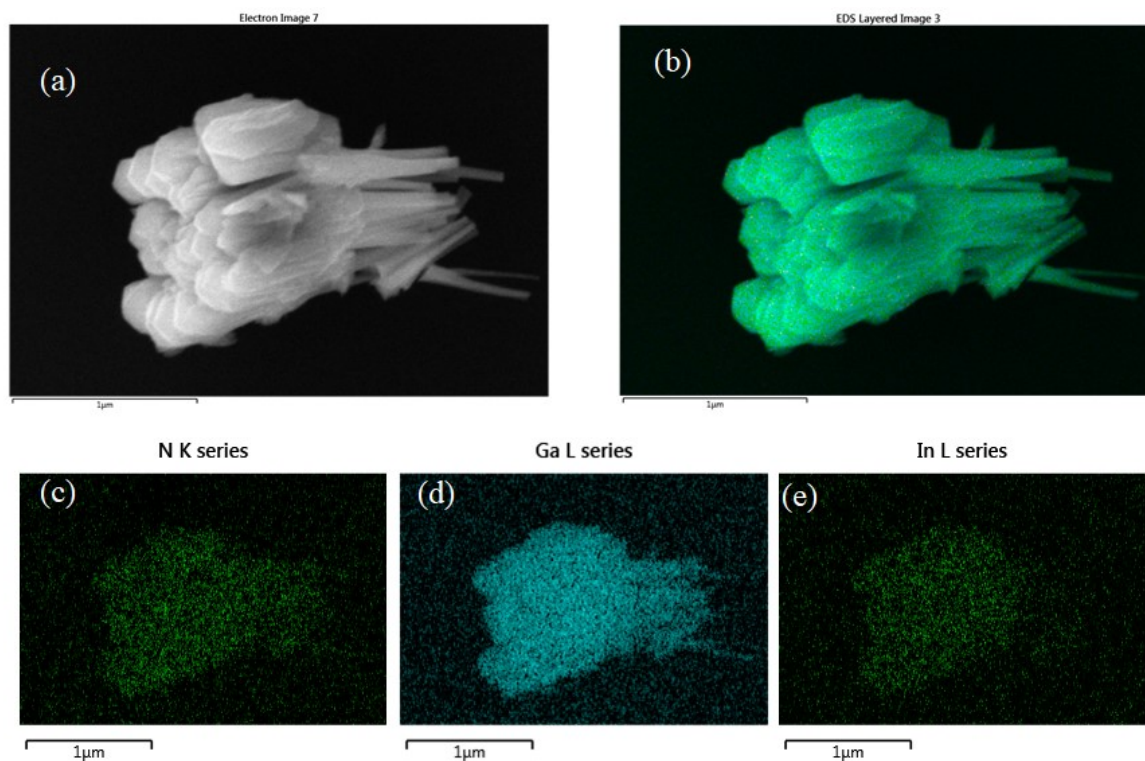

Figure S1. (a) Top-view SEM image of the individually separated nanorod, (b) The elemental mapping of InGaN NRs, (c)N (d) Ga, and (e) In

Figure 2S shows the cross-sectional SEM with EDS line profile from funnel-like shaped InGaN NRs, which offers evidence of the composition nonuniformity of InGaN NRs. The indium composition in the rod shape InGaN NRs and Funnel shaped InGaN NRs are 3, and 10 % respectively as shown in CPS.

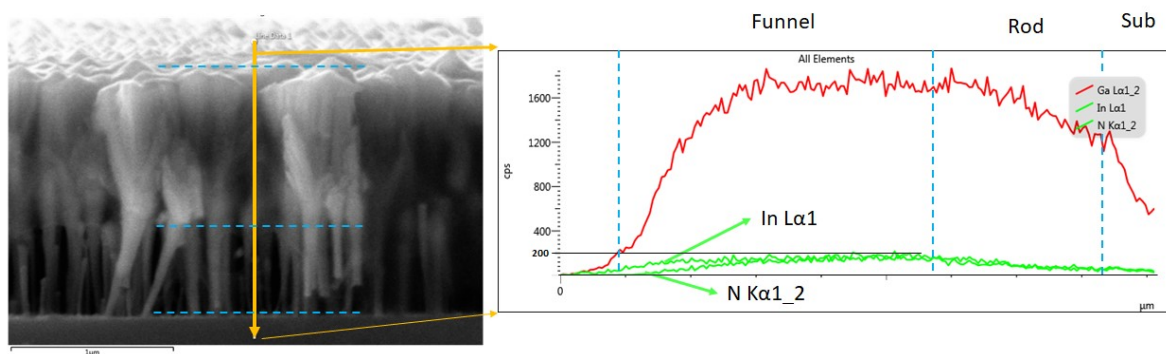

Figure S2. (a) The cross-sectional SEM images of InGaN NRs, and the corresponding EDS line profile measured from a single long InGaN NRs.

Figure S3(a-b) shows the EDS spectra of the popcorn-shaped CuO nanostructures. The EDS spectra of both structures reveal that both products are composed of Cu and O in a 51:49 ratio. Fig. S3(b) shows the EDS spectra of the p-CuO/n-InGaN NRs, which further illustrates the integration of the p-CuO and n-InGaN NRs.

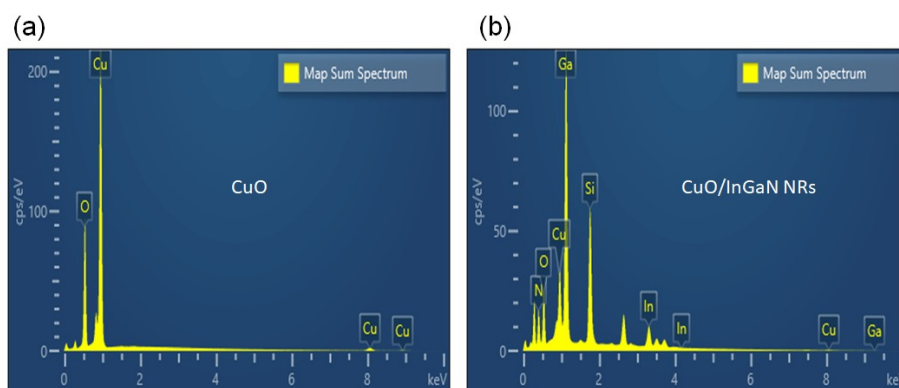

Figure S3 The EDS spectra for (a) CuO, and (b) CuO/InGaN NRs.

Next, popcorn-shaped CuO nanostructure-decorated InGaN NRs were exposed to five repeatable pulses of 100 ppm of  $H_2S$  gas, as shown in Figure S4 (a). Their performance is quite stable without any response deviations for all five repeated cycles (Figure. S4 (b)). Also, the popcorn-CuO/InGaN NR sensor exhibits a larger response than has been discussed in most

previous reports at room temperature (Table S1)

Table S1 Comparison of the performance of our device with the previous reports at RT.

| Ref.     | Material                                             | Temperature (°C) | Target gas       | Response (%)    |
|----------|------------------------------------------------------|------------------|------------------|-----------------|
| 1        | CuO nanoparticles                                    | 80               | H <sub>2</sub> S | 9.8 (10 ppm)    |
| 2        | H <sub>2</sub> treated-AlGaIn/GaN HEMT               | 250              | H <sub>2</sub> S | 15 (90 ppm)     |
| 3        | CdS quantum dots/Co <sub>3</sub> O <sub>4</sub> HMSs | RT               | H <sub>2</sub> S | 12.7 (100 ppm)  |
| 4        | PPy/WO <sub>3</sub>                                  | RT               | H <sub>2</sub> S | 5.25 (1 ppm)    |
| 5        | Pt-gated AlGaIn/GaN HEMT                             | 250              | H <sub>2</sub> S | 22.1 (90 ppm)   |
| 6        | IZO                                                  | RT               | H <sub>2</sub> S | 12.3 (1 ppm)    |
| Our work | Popcorn-CuO/InGaIn NRs                               | RT               | H <sub>2</sub> S | 35.45 (100 ppm) |

## References

1. Ayesh, A. I.; Abu-Hani, A. F. S.; Mahmoud, S. T.; Haik, Y., Selective H<sub>2</sub>S sensor based on CuO nanoparticles embedded in organic membranes. *Sensors and Actuators B: Chemical* **2016**, *231*, 593-600.
2. Zhang, J.; Sokolovskij, R.; Chen, G.; Zhu, Y.; Qi, Y.; Lin, X.; Li, W.; Zhang, G. Q.; Jiang, Y.-L.; Yu, H., Impact of high temperature H<sub>2</sub> pre-treatment on Pt-AlGaIn/GaN HEMT sensor for H<sub>2</sub>S detection. *Sensors and Actuators B: Chemical* **2019**, *280*, 138-143.
3. Dun, M.; Tan, J.; Tan, W.; Tang, M.; Huang, X., CdS quantum dots supported by ultrathin porous nanosheets assembled into hollowed-out Co<sub>3</sub>O<sub>4</sub> microspheres: A room-temperature H<sub>2</sub>S gas sensor with ultra-fast response and recovery. *Sensors and Actuators B: Chemical* **2019**, *298*, 126839.
4. Su, P.-G.; Peng, Y.-T., Fabrication of a room-temperature H<sub>2</sub>S gas sensor based on PPy/WO<sub>3</sub> nanocomposite films by in-situ photopolymerization. *Sensors and Actuators B: Chemical* **2014**, *193*, 637-643.

5. Sokolovskij, R.; Zhang, J.; Iervolino, E.; Zhao, C.; Santagata, F.; Wang, F.; Yu, H.; Sarro, P. M.; Zhang, G. Q., Hydrogen sulfide detection properties of Pt-gated AlGa<sub>N</sub>/Ga<sub>N</sub> HEMT-sensor. *Sensors and Actuators B: Chemical* **2018**, 274, 636-644.
6. Chang, P.-Y.; Lin, C.-F.; El Khoury Roupheal, S.; Huang, T.-H.; Wu, C.-M.; Berling, D.; Yeh, P.-H.; Lu, C.-J.; Meng, H.-F.; Zan, H.-W.; Soppera, O., Near-Infrared Laser-Annealed IZO Flexible Device as a Sensitive H<sub>2</sub>S Sensor at Room Temperature. *ACS Applied Materials & Interfaces* **2020**, 12 (22), 24984-24991.
